# Supplementary material
Source: publisher figshare collection journal article supplement (https://tandf.figshare.com/articles/dataset/_/21393185)
Supplement: Supplementary file 1 [file 1]

| PGL Id | InventID   | Area (m2) | Perim. (m) | Error (m2) | % error | X Cent. | Y Cent. | Elev. (m) | IceCont. | IcyBord. | Mor.Dam | GLIMSIId      | Gl Area (m2) | Slope | Aspct |
|--------|------------|-----------|------------|------------|---------|---------|---------|-----------|----------|----------|---------|---------------|--------------|-------|-------|
| 1      | G018519E68 | 157516    | 1750       | 9019.50    | 5.73    | 398416  | 7587487 | 1267      | 1        | 1        | 0       | G018519E68381 | 265647       | 14.5  | 103   |
| 2      | G018321E68 | 3914      | 290        | 1494.66    | 38.19   | 390389  | 7585430 | 996       | 1        | 0        | 0       | G018321E68358 | 930297       | 19.8  | 59    |
| 3      | G018321E68 | 5284      | 290        | 1494.66    | 28.29   | 390326  | 7585518 | 1006      | 1        | 0        | 0       | G018321E68358 | 930297       | 19.8  | 59    |
| 4      | G018305E68 | 15562     | 617        | 3180.02    | 20.43   | 389277  | 7583541 | 1153      | 0        | 0        | 0       | G018305E68350 | 261373       | 21    | 165   |
| 5      | G018305E68 | 18696     | 545        | 2808.93    | 15.02   | 389591  | 7583455 | 1154      | 0        | 1        | 0       | G018305E68350 | 261373       | 21    | 165   |
| 6      | G018280E68 | 163140    | 2425       | 12498.45   | 7.66    | 388917  | 7583215 | 1144      | 0        | 0        | 0       | G018280E68344 | 227518       | 23.6  | 92    |
| 7      | G018754E68 | 3481      | 260        | 1340.04    | 38.50   | 407447  | 7570004 | 1309      | 1        | 0        | 0       | G018754E68227 | 373112       | 25.9  | 68    |
| 8      | G018771E68 | 11979     | 575        | 2963.55    | 24.74   | 407684  | 7569666 | 1310      | 0        | 0        | 1       | G018771E68219 | 711778       | 26.3  | 25    |
| 9      | G018798E68 | 6545      | 317        | 1633.82    | 24.96   | 409079  | 7568655 | 1373      | 0        | 1        | 1       | G018798E68213 | 343390       | 28.6  | 54    |
| 10     | G018845E68 | 19019     | 534        | 2752.24    | 14.47   | 410884  | 7566940 | 1411      | 1        | 0        | 1       | G018845E68202 | 152658       | 26.5  | 84    |
| 11     | G018573E68 | 6820      | 417        | 2149.22    | 31.51   | 398993  | 7562343 | 1244      | 0        | 0        | 0       | G018573E68147 | 2239260      | 20    | 22    |
| 12     | G018648E68 | 19206     | 712        | 3669.65    | 19.11   | 402551  | 7559037 | 1349      | 1        | 1        | 1       | G018648E68125 | 340392       | 22    | 69    |
| 13     | G018666E68 | 7606      | 371        | 1912.13    | 25.14   | 403149  | 7558696 | 1423      | 0        | 0        | 1       | G018666E68120 | 672527       | 18.8  | 5     |
| 14     | G018679E68 | 242736    | 2349       | 12106.75   | 4.99    | 404654  | 7555622 | 1318      | 1        | 1        | 1       | G018679E68100 | 1486665      | 15.5  | 74    |
| 15     | G018681E68 | 30578     | 739        | 3808.81    | 12.46   | 405180  | 7553846 | 1359      | 1        | 0        | 0       | G018681E68082 | 3571629      | 12.9  | 84    |
| 16     | G018611E68 | 346719    | 2519       | 12982.93   | 3.74    | 400803  | 7550388 | 1382      | 1        | 1        | 1       | G018611E68053 | 105949       | 41.9  | 103   |
| 17     | G018617E68 | 756       | 112        | 577.25     | 76.36   | 400942  | 7551985 | 1273      | 0        | 1        | 0       | G018617E68062 | 183004       | 34    | 54    |
| 18     | G018427E68 | 2439      | 213        | 1097.80    | 45.01   | 392437  | 7551756 | 1305      | 0        | 0        | 1       | G018427E68051 | 1056675      | 15.3  | 5     |
| 19     | G018336E68 | 24587     | 609        | 3138.79    | 12.77   | 388877  | 7549440 | 1620      | 1        | 1        | 0       | G018336E68041 | 246051       | 11.6  | 345   |
| 20     | G018498E68 | 22030     | 568        | 2927.47    | 13.29   | 396253  | 7545281 | 1406      | 1        | 0        | 1       | G018498E68003 | 1103420      | 17.6  | 89    |
| 21     | G018498E68 | 6656      | 346        | 1783.28    | 26.79   | 396474  | 7545299 | 1406      | 0        | 0        | 0       | G018498E68003 | 1103420      | 17.6  | 89    |
| 22     | G018405E67 | 88064     | 1938       | 9988.45    | 11.34   | 392100  | 7543932 | 1304      | 1        | 1        | 1       | G018405E67985 | 1014926      | 25.3  | 37    |
| 23     | G018431E67 | 230764    | 2372       | 12225.29   | 5.30    | 393632  | 7543097 | 1243      | 0        | 0        | 1       | G018431E67975 | 1608398      | 18.7  | 20    |
| 24     | G018550E67 | 132172    | 1717       | 8849.42    | 6.70    | 398139  | 7539916 | 1124      | 1        | 0        | 0       | G018550E67945 | 1533959      | 25.7  | 26    |
| 25     | G018600E67 | 6180      | 339        | 1747.21    | 28.27   | 399467  | 7537290 | 1462      | 0        | 1        | 1       | G018600E67937 | 448759       | 24.7  | 138   |
| 26     | G018645E67 | 2182      | 192        | 989.57     | 45.35   | 401749  | 7537520 | 1420      | 0        | 1        | 1       | G018645E67935 | 1024227      | 23.2  | 91    |
| 27     | G018560E67 | 560589    | 3297       | 16992.74   | 3.03    | 398907  | 7536288 | 1194      | 0        | 1        | 1       | G018560E67923 | 670186       | 22.2  | 73    |
| 28     | G018562E67 | 11026     | 397        | 2046.14    | 18.56   | 399232  | 7535372 | 1195      | 0        | 0        | 0       | G018562E67914 | 1284257      | 17.6  | 96    |
| 29     | G018562E67 | 14936     | 524        | 2700.70    | 18.08   | 398939  | 7535360 | 1203      | 0        | 0        | 1       | G018562E67914 | 1284257      | 17.6  | 96    |
| 30     | G018562E67 | 1132      | 138        | 711.25     | 62.83   | 399151  | 7535450 | 1198      | 0        | 0        | 0       | G018562E67914 | 1284257      | 17.6  | 96    |
| 31     | G018562E67 | 7575      | 437        | 2252.30    | 29.73   | 399213  | 7535664 | 1195      | 0        | 0        | 0       | G018562E67914 | 1284257      | 17.6  | 96    |
| 32     | G018519E67 | 19492     | 549        | 2829.55    | 14.52   | 396356  | 7536713 | 1401      | 0        | 1        | 1       | G018519E67924 | 516830       | 21.3  | 8     |
| 33     | G018393E67 | 5797      | 317        | 1633.82    | 28.18   | 389898  | 7541996 | 1292      | 1        | 0        | 0       | G018393E67968 | 1693777      | 17.7  | 330   |
| 34     | G018393E67 | 744       | 112        | 577.25     | 77.59   | 389801  | 7542052 | 1292      | 0        | 0        | 0       | G018393E67968 | 1693777      | 17.7  | 330   |
| 35     | G018309E67 | 6072      | 361        | 1860.59    | 30.64   | 387920  | 7544066 | 1260      | 0        | 0        | 0       | G018309E67989 | 227322       | 30.2  | 55    |
| 36     | G018164E68 | 948       | 127        | 654.56     | 69.05   | 382681  | 7561290 | 1205      | 1        | 0        | 1       | G018164E68144 | 395579       | 25.5  | 63    |
| 37     | G018164E68 | 35040     | 936        | 4824.14    | 13.77   | 382499  | 7561972 | 1213      | 0        | 0        | 0       | G018164E68144 | 395579       | 25.5  | 63    |
| 38     | G018205E68 | 5968      | 338        | 1742.05    | 29.19   | 384346  | 7558685 | 1279      | 0        | 0        | 0       | G018205E68118 | 552809       | 17    | 104   |

|    |            |        |      |          |        |        |         |      |   |   |   |                  |         |      |     |
|----|------------|--------|------|----------|--------|--------|---------|------|---|---|---|------------------|---------|------|-----|
| 39 | G018205E68 | 211513 | 1791 | 9230.81  | 4.36   | 384425 | 7557923 | 1123 | 0 | 1 | 0 | G018205E68118    | 552809  | 17   | 104 |
| 40 | ProGL      | 28281  | 696  | 3587.18  | 12.68  | 378859 | 7559660 | 1267 | 0 | 1 | 0 | Not in INVENTORY |         |      |     |
| 41 | G018150E68 | 686233 | 4692 | 24182.57 | 3.52   | 382205 | 7556166 | 1169 | 0 | 1 | 1 | G018150E68103    | 71160   | 16.4 | 110 |
| 42 | G018054E68 | 220826 | 2626 | 13534.40 | 6.13   | 378794 | 7555335 | 1090 | 0 | 0 | 0 | G018054E68084    | 2301468 | 11.3 | 79  |
| 43 | G017909E68 | 28590  | 770  | 3968.58  | 13.88  | 371542 | 7552628 | 1308 | 0 | 1 | 0 | G017909E68066    | 297284  | 21.5 | 81  |
| 44 | G018012E68 | 7198   | 359  | 1850.29  | 25.71  | 375980 | 7556580 | 1183 | 1 | 0 | 0 | G018012E68094    | 559112  | 19.1 | 44  |
| 45 | G018054E68 | 2319   | 201  | 1035.95  | 44.67  | 378022 | 7555648 | 1178 | 0 | 0 | 0 | G018054E68084    | 2301468 | 11.3 | 79  |
| 46 | G018054E68 | 2441   | 229  | 1180.27  | 48.35  | 392615 | 7539865 | 1316 | 0 | 0 | 0 | G018054E68084    | 2301468 | 11.3 | 79  |
| 47 | G018166E67 | 6678   | 389  | 2004.91  | 30.02  | 381186 | 7530398 | 1418 | 0 | 1 | 1 | G018166E67863    | 186759  | 21.9 | 128 |
| 48 | G017913E67 | 85537  | 1261 | 6499.19  | 7.60   | 370428 | 7522305 | 1213 | 0 | 1 | 0 | G017913E67784    | 283063  | 26.9 | 97  |
| 49 | G017794E67 | 2964   | 252  | 1298.81  | 43.82  | 364569 | 7514179 | 1214 | 0 | 0 | 0 | G017794E67715    | 1548853 | 16.6 | 170 |
| 50 | G017878E67 | 41779  | 971  | 5004.53  | 11.98  | 368158 | 7511099 | 1296 | 1 | 1 | 0 | G017878E67685    | 284076  | 23.3 | 103 |
| 51 | G018408E67 | 86144  | 1196 | 6164.18  | 7.16   | 390364 | 7509995 | 1321 | 1 | 1 | 1 | G018408E67686    | 93071   | 27.3 | 128 |
| 52 | G018356E67 | 35478  | 860  | 4432.44  | 12.49  | 388261 | 7509029 | 1378 | 1 | 1 | 1 | G018356E67676    | 349005  | 19.4 | 109 |
| 53 | G018468E67 | 149143 | 2189 | 11282.11 | 7.56   | 392994 | 7502421 | 1227 | 1 | 1 | 1 | G018468E67615    | 398244  | 21.1 | 77  |
| 54 | G018300E67 | 96050  | 1356 | 6988.82  | 7.28   | 385206 | 7494245 | 1243 | 1 | 1 | 1 | G018300E67543    | 92330   | 35.8 | 97  |
| 55 | G017474E67 | 1849   | 164  | 845.26   | 45.71  | 350014 | 7501737 | 1394 | 0 | 0 | 1 | G017474E67585    | 1359667 | 20.7 | 4   |
| 56 | G017474E67 | 5819   | 289  | 1489.51  | 25.60  | 350259 | 7502058 | 1366 | 0 | 1 | 0 | G017474E67585    | 1359667 | 20.7 | 4   |
| 57 | G017517E67 | 24664  | 583  | 3004.78  | 12.18  | 352118 | 7500966 | 1582 | 1 | 1 | 1 | G017517E67588    | 314808  | 17   | 111 |
| 58 | G017476E67 | 4253   | 263  | 1355.50  | 31.87  | 350199 | 7498793 | 1301 | 1 | 1 | 1 | G017476E67571    | 383786  | 26.1 | 137 |
| 59 | G017595E67 | 13349  | 584  | 3009.94  | 22.55  | 354990 | 7489578 | 1246 | 1 | 0 | 1 | G017595E67485    | 276708  | 32.5 | 45  |
| 60 | G017578E67 | 14428  | 445  | 2293.53  | 15.90  | 355394 | 7489015 | 1133 | 1 | 0 | 1 | G017578E67471    | 6627727 | 13.8 | 63  |
| 61 | G017578E67 | 4560   | 269  | 1386.43  | 30.40  | 355561 | 7488701 | 1143 | 1 | 0 | 0 | G017578E67471    | 6627727 | 13.8 | 63  |
| 62 | G017630E67 | 2827   | 259  | 1334.89  | 47.22  | 356771 | 7487412 | 1409 | 0 | 0 | 0 | G017630E67456    | 1428910 | 18.4 | 43  |
| 63 | G017630E67 | 1583   | 150  | 773.10   | 48.84  | 356589 | 7487067 | 1455 | 0 | 0 | 0 | G017630E67456    | 1428910 | 18.4 | 43  |
| 64 | G017701E67 | 7647   | 325  | 1675.05  | 21.90  | 358809 | 7486332 | 1345 | 0 | 0 | 0 | G017701E67443    | 3583619 | 15.3 | 14  |
| 65 | G017663E67 | 4544   | 263  | 1355.50  | 29.83  | 358521 | 7487589 | 1176 | 0 | 0 | 0 | G017663E67454    | 2868518 | 15.1 | 53  |
| 66 | G017701E67 | 4284   | 278  | 1432.81  | 33.45  | 358631 | 7485847 | 1418 | 1 | 1 | 0 | G017701E67443    | 3583619 | 15.3 | 14  |
| 67 | G017701E67 | 1843   | 166  | 855.56   | 46.42  | 358668 | 7485742 | 1420 | 0 | 0 | 0 | G017701E67443    | 3583619 | 15.3 | 14  |
| 68 | G017701E67 | 1110   | 133  | 685.48   | 61.76  | 358289 | 7487319 | 1216 | 0 | 0 | 0 | G017663E67454    | 2868518 | 15.1 | 53  |
| 69 | G017701E67 | 520    | 88   | 453.55   | 87.22  | 358368 | 7487324 | 1216 | 0 | 0 | 0 | G017663E67454    | 2868518 | 15.1 | 53  |
| 70 | G017701E67 | 126    | 52   | 268.01   | 212.70 | 358420 | 7487283 | 1216 | 0 | 0 | 0 | G017663E67454    | 2868518 | 15.1 | 53  |
| 71 | G017819E67 | 853    | 120  | 618.48   | 72.51  | 365444 | 7480106 | 1300 | 0 | 0 | 0 | G017819E67404    | 2807040 | 15.4 | 81  |
| 72 | G017716E67 | 5064   | 332  | 1711.13  | 33.79  | 359144 | 7479313 | 1438 | 1 | 1 | 0 | G017716E67400    | 180496  | 22.6 | 153 |
| 73 | G017431E67 | 3764   | 239  | 1231.81  | 32.73  | 346493 | 7483229 | 1350 | 1 | 0 | 1 | G017431E67426    | 1679360 | 13.6 | 354 |
| 74 | G017431E67 | 21469  | 680  | 3504.72  | 16.32  | 346152 | 7483445 | 1333 | 0 | 1 | 0 | G017431E67426    | 1679360 | 13.6 | 354 |
| 75 | G017431E67 | 914    | 122  | 628.79   | 68.80  | 346153 | 7483070 | 1362 | 0 | 0 | 1 | G017431E67426    | 1679360 | 13.6 | 354 |
| 76 | G017439E67 | 5502   | 328  | 1690.51  | 30.73  | 347456 | 7478864 | 1204 | 0 | 0 | 0 | G017439E67392    | 556380  | 19   | 144 |
| 77 | G017439E67 | 14384  | 578  | 2979.01  | 20.71  | 347289 | 7478831 | 1199 | 0 | 1 | 1 | G017439E67392    | 556380  | 19   | 144 |

|        |            |         |           |          |       |        |          |      |    |         |    |                  |         |      |     |
|--------|------------|---------|-----------|----------|-------|--------|----------|------|----|---------|----|------------------|---------|------|-----|
| 78     | G017596E67 | 5552    | 302       | 1556.51  | 28.04 | 353763 | 7474526  | 1476 | 1  | 0       | 1  | G017596E67347    | 616688  | 13.3 | 12  |
| 79     | G017575E67 | 91254   | 1248      | 6432.19  | 7.05  | 353251 | 7472092  | 1496 | 1  | 1       | 1  | G017575E67328    | 264124  | 19.9 | 81  |
| 80     | G017624E67 | 21626   | 629       | 3241.87  | 14.99 | 355415 | 7470812  | 1275 | 1  | 0       | 1  | G017624E67315    | 816304  | 13.5 | 85  |
| 81     | G017575E67 | 175832  | 2092      | 10782.17 | 6.13  | 352279 | 7470780  | 1441 | 1  | 1       | 0  | G017575E67311    | 1755474 | 14.5 | 33  |
| 82     | ProGL      | 3227    | 228       | 1175.11  | 36.41 | 350430 | 7466643  | 1350 | 1  | 0       | 0  | Not in INVENTORY |         |      |     |
| 83     | G017905E67 | 1444    | 172       | 886.49   | 61.39 | 366722 | 7474095  | 1284 | 1  | 0       | 0  | G017905E67346    | 1804005 | 17.5 | 360 |
| 84     | G018060E67 | 19879   | 556       | 2865.62  | 14.42 | 373588 | 7467135  | 1278 | 1  | 1       | 1  | G018060E67294    | 51540   | 32.9 | 66  |
| 85     | ProGL      | 2718    | 210       | 1082.34  | 39.82 | 368670 | 7464453  | 1359 | 1  | 1       | 1  | Not in INVENTORY |         |      |     |
| 86     | G017931E67 | 957     | 121       | 623.63   | 65.17 | 367235 | 7464760  | 1309 | 0  | 0       | 0  | G017931E67276    | 788586  | 17.5 | 188 |
| 87     | G017931E67 | 1072    | 129       | 664.87   | 62.02 | 367147 | 7464726  | 1302 | 0  | 0       | 0  | G017931E67276    | 788586  | 17.5 | 188 |
| 88     | G017931E67 | 875     | 121       | 623.63   | 71.27 | 367345 | 7464931  | 1325 | 0  | 0       | 1  | G017931E67276    | 788586  | 17.5 | 188 |
| 89     | G017426E67 | 53975   | 1125      | 5798.25  | 10.74 | 346152 | 7463110  | 1499 | 1  | 1       | 0  | G017426E67249    | 1063866 | 16.7 | 141 |
| 90     | G017389E67 | 11890   | 453       | 2334.76  | 19.64 | 343713 | 7461441  | 1228 | 0  | 0       | 1  | G017389E67240    | 2978231 | 15.5 | 138 |
| 91     | G017389E67 | 1231    | 148       | 762.79   | 61.97 | 343862 | 7461198  | 1222 | 0  | 0       | 0  | G017389E67240    | 2978231 | 15.5 | 138 |
| 92     | G017389E67 | 14318   | 469       | 2417.23  | 16.88 | 344271 | 7459263  | 1269 | 0  | 0       | 0  | G017389E67240    | 2978231 | 15.5 | 138 |
| 93     | G017389E67 | 18103   | 795       | 4097.43  | 22.63 | 344284 | 7459475  | 1270 | 0  | 0       | 1  | G017389E67240    | 2978231 | 15.5 | 138 |
| 94     | G017688E67 | 48522   | 999       | 5148.85  | 10.61 | 357041 | 7456383  | 1317 | 1  | 1       | 0  | G017688E67188    | 238473  | 28.3 | 59  |
| 95     | G017589E67 | 24551   | 600       | 3092.40  | 12.60 | 351409 | 7456035  | 1339 | 0  | 0       | 1  | G017589E67183    | 2561335 | 17.4 | 322 |
| 96     | G017549E67 | 55927   | 983       | 5066.38  | 9.06  | 350887 | 7455623  | 1356 | 1  | 0       | 1  | G017549E67177    | 344628  | 22.9 | 346 |
| 97     | G017549E67 | 1466    | 154       | 793.72   | 54.14 | 350604 | 7455512  | 1341 | 0  | 0       | 1  | G017549E67177    | 344628  | 22.9 | 346 |
| 98     | G017549E67 | 3495    | 238       | 1226.65  | 35.10 | 350554 | 7455694  | 1320 | 0  | 0       | 0  | G017549E67177    | 344628  | 22.9 | 346 |
| 99     | G017549E67 | 5743    | 320       | 1649.28  | 28.72 | 350350 | 7455508  | 1331 | 0  | 0       | 1  | G017549E67177    | 344628  | 22.9 | 346 |
| 100    | G017589E67 | 3134    | 236       | 1216.34  | 38.81 | 351627 | 7457129  | 1287 | 0  | 0       | 1  | G017589E67183    | 2561335 | 17.4 | 322 |
| 101    | G017589E67 | 1268    | 151       | 778.25   | 61.38 | 351965 | 7456645  | 1343 | 0  | 0       | 1  | G017589E67183    | 2561335 | 17.4 | 322 |
| 102    | G017072E67 | 9041    | 359       | 1850.29  | 20.47 | 329056 | 7435864  | 1400 | 1  | 1       | 0  | G017072E66993    | 260503  | 23.9 | 79  |
| 103    | G017320E67 | 7135    | 368       | 1896.67  | 26.58 | 343320 | 7493460  | 1186 | 0  | 0       | 1  | G017320E67510    | 590856  | 24.8 | 42  |
| 104    | G017320E67 | 1457    | 153       | 788.56   | 54.12 | 343366 | 7493381  | 1187 | 0  | 0       | 1  | G017320E67510    | 590856  | 24.8 | 42  |
| 105    | G018686E67 | 8072    | 423       | 2180.14  | 27.01 | 404439 | 7568324  | 1435 | 1  | 1       | 1  | G018686E68211    | 276890  | 25.5 | 50  |
| 106    | G018270E67 | 25314   | 617       | 3180.02  | 12.56 | 383971 | 7496052  | 1362 | 1  | 1       | 1  | G018270E67558    | 73958   | n    |     |
| 107    | G017721E67 | 60635   | 1111      | 5726.09  | 9.44  | 336881 | 7454392  | 1234 | 0  | 1       | 1  | G017721E67160    | 271890  | 24   | 81  |
| 108    | G018054E67 | 12047   | 485       | 2499.69  | 20.75 | 377296 | 7554092  | 1336 | 1  | 1       | 1  | G018054E68079    | 1919289 | 8.3  | 153 |
| TOTALS |            | 4772240 | 377231.57 |          |       |        |          |      | 44 | 42      | 51 | 130206894        |         |      |     |
| Mean   |            | 44187   | 677.7037  | 3492.88  |       |        | 1296.398 |      |    | 1240066 |    |                  |         |      |     |
| Median |            | 7591    | 380       | 1958.52  |       |        | 788586   |      |    |         |    |                  |         |      |     |
